# Supplementary material for: Combined 7Li NMR, density functional theory and operando synchrotron X-ray powder diffraction to investigate a structural evolution of cathode material LiFeV2O7
Source: Royal Society of Chemistry journal article supplement (doi:10.1039/d4fd00077c), 2024-06-03
Supplement: d4fd00077c1.pdf [file d4fd00077c1.pdf]

**A Combined  $^7\text{Li}$  NMR, Density Functional Theory and Operando Synchrotron X-Ray Powder Diffraction to Investigate a Structural Evolution of Cathode Material  $\text{LiFeV}_2\text{O}_7$**

SUPPORTING INFORMATION

Taiana L. E. Pereira<sup>1</sup>, Jon Serrano Sevillano<sup>2,3</sup>, Beatriz D. Moreno<sup>4</sup>, Joel W. Reid<sup>4</sup>, Dany Carlier<sup>4</sup> and Gillian R. Goward<sup>4\*</sup>

<sup>1</sup>Department of Chemistry & Chemical Biology, McMaster University, 1280 Main St. West, Hamilton, Ontario L8S 4M1, Canada

<sup>2</sup> Centro de Investigación Cooperativa de Energías Alternativas (CIC energiGUNE), Basque Research and Technology Alliance (BRTA), 01510 Vitoria-Gasteiz, Spain.

<sup>3</sup>CNRS, Bordeaux INP, ICMCB UMR5026, Université Bordeaux, F-33600 Pessac, France.

<sup>4</sup>Canadian Light Source, 44 Innovation Boulevard, Saskatoon, Sk, S7N 2V3, Canada

\*corresponding author

goward@mcmaster.ca

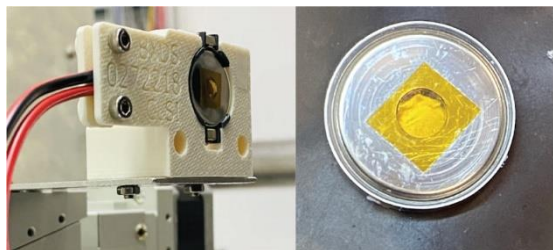

**Figure S1.** Photographs of (a) The custom-built cell holder and (b) a modified coin cell used for the *operando* studies.

### **$^7\text{Li}$ MAS NMR Experimental description**

The pristine samples were collected using the same parameters.  $^7\text{Li}$  MAS NMR experiments were acquired using a Bruker Avance III HD spectrometer operating at a Larmor frequency of 116.64 MHz (7.05 T) using a Bruker 1.3 mm HX probe at a spinning frequency of 60 kHz. The spectra are referenced to 1M  $\text{LiCl}_{(\text{aq})}$  at 0 ppm. One-dimensional  $^7\text{Li}$  MAS spectra were obtained using a double spin echo pulse sequence utilizing short, high-power adiabatic pulses (SHAPs)<sup>1</sup> following a  $1.25 \mu\text{s} \frac{\pi}{2}$  excitation pulse. The SHAPs utilized a tanh/tan shape, a 5 MHz frequency sweep, and were 50 microseconds in length with a maximum RF field strength of 200 kHz. Under these conditions, the SHAPs are expected to be >99% efficient.<sup>2</sup>  $T_1$  relaxation times were determined using a standard inversion-recovery sequence.

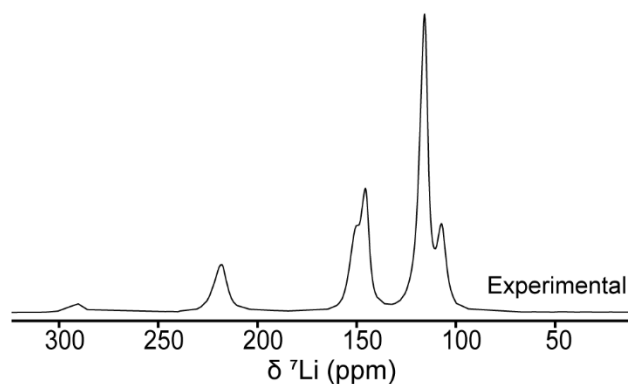

**Figure S2.**  $^7\text{Li}$  MAS ssNMR spectrum of pristine  $\text{LiFeV}_2\text{O}_7$ .

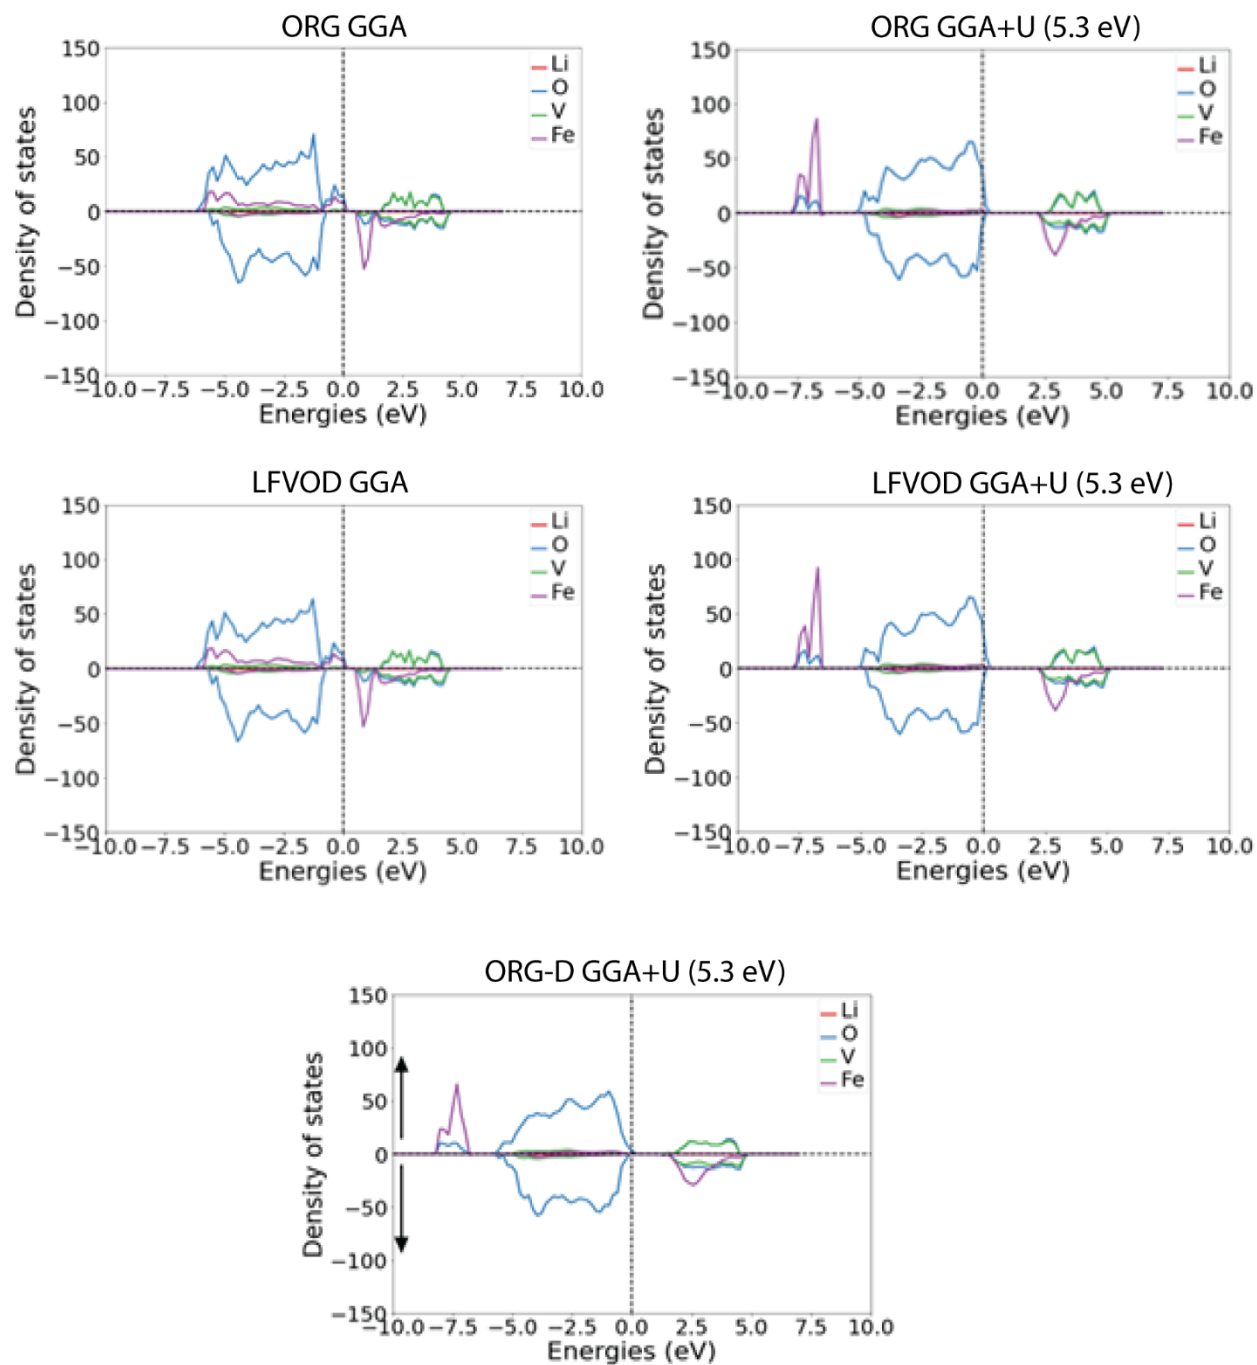

**Figure S3.** Calculated total spin DOS for the three models of  $\text{LiFeV}_2\text{O}_7$  (ORG, LFVOD, and ORG-D) with GGA and GGAU where the color coding of lines are elements.

**Table S1:** Calculated Fermi contact shifts for Li sites in ORG and LFVOD structures calculated using GGA and GGA+U methods.

| Atom                    | EXP   |       | Calculated $^7\text{Li}$ shifts (ppm) |                          |                          |                          |              |                            |
|-------------------------|-------|-------|---------------------------------------|--------------------------|--------------------------|--------------------------|--------------|----------------------------|
|                         |       |       | ORG<br>GGA                            | ORG<br>GGA+U<br>(5.3 eV) | ORG<br>GGA+U<br>(4.3 eV) | ORG<br>GGA+U<br>(3.5 eV) | LFVOD<br>GGA | LFVOD<br>GGA+U<br>(5.3 eV) |
| <b>Li1</b>              | 146   | 150.2 | 339.2                                 | 184.5                    | 192.4                    | 207.9                    | 323.4        | 176.9                      |
| <b>Li2</b>              | 219   |       | 454.9                                 | 276.8                    | 300.2                    | 323.4                    | 338.9        | 284.5                      |
| <b>Li3</b>              | 107.2 | 115.6 | 262.1                                 | 169.2                    | 215.5                    | 238.7                    | 238.8        | 176.9                      |
| <b>Extra<br/>Signal</b> | 292   |       |                                       |                          |                          |                          |              |                            |

**Table S2.** Calculated Li-Fe distances and Li-O-Fe angle using GGA approach.

| ORG        |                   |                      | LFVOD |                   |                      |
|------------|-------------------|----------------------|-------|-------------------|----------------------|
| Site       | dLi-Fe (Å)        | Li-O-Fe angles (°)   | Site  | dLi-Fe (Å)        | Li-O-Fe angles (°)   |
| <b>Li1</b> | Li1-Fe3 = 3.1199  | Li1-O21-Fe2 = 139.51 | Li1   | Li1-Fe3 = 3.14778 | Li1-O21-Fe2 = 129.25 |
|            | Li1-Fe2 = 4.3147  | Li1-O19-Fe3 = 100.72 |       | Li1-Fe2 = 3.72287 | Li1-O03-Fe3 = 93.80  |
|            |                   | Li1-O03-Fe3 = 92.41  |       |                   | Li1-O19-Fe3 = 101.88 |
| <b>Li2</b> | Li2-Fe2 = 3.0527  | Li2-O04-Fe2 = 98.55  | Li2   | Li2-Fe2 = 3.0559  | Li2-O18-Fe2 = 96.88  |
|            | Li2-Fe3 = 3.4602  | Li2-O18-Fe2 = 96.47  |       | Li2-Fe3 = 3.5075  | Li2-O4-Fe2 = 98.85   |
|            | Li2-Fe1 = 3.5226  | Li2-O20-Fe1 = 118.49 |       | Li2-Fe1 = 3.47579 | Li2-O02-Fe1 = 113.83 |
|            |                   | Li2-O02-Fe3 = 112.51 |       |                   | Li2-O20-Fe3 = 117.45 |
| <b>Li3</b> | Li3-Fe1 = 3.18089 | Li3-O15-Fe1 = 102.79 | Li3   | Li3-Fe1 = 3.15090 | Li3-O09-Fe1 = 99.03  |
|            | Li3-Fe2 = 3.73974 | Li3-O09-Fe1 = 94.33  |       | Li3-Fe2 = 3.14713 | Li3-O15-Fe1 = 100.24 |
|            |                   | Li3-O01-Fe2 = 129.53 |       |                   | Li3-O01-Fe2 = 140.21 |

**Table S3.** Calculated Li-Fe distances and Li-O-Fe angle using GGA+U (5.3 eV) approach.

| ORG        |                  |                      | LFVOD |                  |                      |
|------------|------------------|----------------------|-------|------------------|----------------------|
| Site       | dLi-Fe (Å)       | Li-O-Fe angles (°)   | Site  | dLi-Fe (Å)       | Li-O-Fe angles (°)   |
| <b>Li1</b> | Li1-Fe3 = 3.1389 | Li1-O21-Fe2 = 140.12 | Li1   | Li1-Fe3 = 3.1716 | Li1-O21-Fe2 = 129.88 |
|            | Li1-Fe2 = 4.3273 | Li1-O19-Fe3 = 100.70 |       | Li1-Fe2 = 3.7070 | Li1-O03-Fe3 = 95.75  |
|            |                  | Li1-O03-Fe3 = 100.70 |       |                  | Li1-O19-Fe3 = 101.39 |
| <b>Li2</b> | Li2-Fe2 = 3.0421 | Li2-O04-Fe2 = 97.96  | Li2   | Li2-Fe2 = 3.0368 | Li2-O18-Fe2 = 96.97  |
|            | Li2-Fe3 = 3.4569 | Li2-O18-Fe2 = 96.80  |       | Li2-Fe3 = 3.5171 | Li2-O04-Fe2 = 98.67  |
|            | Li2-Fe1 = 3.5458 | Li2-O20-Fe1 = 118.76 |       | Li2-Fe1 = 3.4789 | Li2-O02-Fe1 = 114.66 |
|            |                  | Li2-O02-Fe3 = 112.72 |       |                  | Li2-O20-Fe3 = 118.13 |
| <b>Li3</b> | Li3-Fe1 = 3.1790 | Li3-O15-Fe1 = 102.59 | Li3   | Li3-Fe1 = 3.1509 | Li3-O09-Fe1 = 98.71  |
|            | Li3-Fe2 = 3.7448 | Li3-O09-Fe1 = 94.74  |       | Li3-Fe2 = 4.2966 | Li3-O15-Fe1 = 100.54 |
|            |                  | Li3-O01-Fe2 = 129.57 |       |                  | Li3-O01-Fe2 = 141.77 |

**Table S4.** Calculated Li-Fe distances and Li-O-Fe angle for ORG-D using GGA+U (5.3 eV) approach.

| <b>ORG site</b> | <b>ORG-D Site</b> | <b>dLi-Fe (Å)</b>              | <b>Li-O-Fe angles (°)</b>          |
|-----------------|-------------------|--------------------------------|------------------------------------|
| <b>Li1</b>      | Li1 <sub>a</sub>  | Li1 <sub>a</sub> -Fe3 = 3.1722 | Li1 <sub>a</sub> -O19-Fe3 = 102.71 |
|                 |                   | Li1 <sub>a</sub> -Fe2 = 4.2526 | Li1 <sub>a</sub> -O21-Fe2 = 138.94 |
|                 |                   |                                | Li1 <sub>a</sub> -O03-Fe3 = 97.30  |
| <b>Li1</b>      | Li1 <sub>b</sub>  | Li1 <sub>b</sub> -Fe3 = 3.2005 | Li1 <sub>b</sub> -O03-Fe3 = 99.96  |
|                 |                   | Li1 <sub>b</sub> -Fe2 = 4.2014 | Li1 <sub>b</sub> -O19-Fe3 = 100.51 |
|                 |                   |                                | Li1 <sub>b</sub> -O21-Fe2 = 140.56 |
| <b>Li1</b>      | Li1 <sub>c</sub>  | Li1 <sub>c</sub> -Fe3 = 3.1379 | Li1 <sub>c</sub> -O19-Fe3 = 100.68 |
|                 |                   | Li1 <sub>c</sub> -Fe2 = 4.2804 | Li1 <sub>c</sub> -O03-Fe3 = 98.64  |
|                 |                   |                                | Li1 <sub>c</sub> -O21-Fe2 = 141.72 |
| <b>Li1</b>      | Li1 <sub>d</sub>  | Li1 <sub>d</sub> -Fe3 = 3.1527 | Li1 <sub>d</sub> -O03-Fe3 = 97.25  |
|                 |                   | Li1 <sub>d</sub> -Fe2 = 4.1537 | Li1 <sub>d</sub> -O19-Fe3 = 101.91 |
|                 |                   |                                | Li1 <sub>d</sub> -O21-Fe2 = 138.20 |
| <b>Li2</b>      | Li2 <sub>a</sub>  | Li2 <sub>a</sub> -Fe2 = 3.0020 | Li2 <sub>a</sub> -O02-Fe3 = 114.11 |
|                 |                   | Li2 <sub>a</sub> -Fe3 = 3.4707 | Li2 <sub>a</sub> -O20-Fe1 = 117.48 |
|                 |                   | Li2 <sub>a</sub> -Fe1 = 3.4946 | Li2 <sub>a</sub> -O04-Fe2 = 98.04  |
|                 |                   |                                | Li2 <sub>a</sub> -O18-Fe2 = 96.55  |
| <b>Li2</b>      | Li2 <sub>b</sub>  | Li2 <sub>b</sub> -Fe2 = 2.9785 | Li2 <sub>b</sub> -O04-Fe2 = 98.04  |
|                 |                   | Li2 <sub>b</sub> -Fe3 = 3.4663 | Li2 <sub>b</sub> -O18-Fe2 = 96.20  |
|                 |                   | Li2 <sub>b</sub> -Fe1 = 3.5999 | Li2 <sub>b</sub> -O02-Fe3 = 112.90 |
|                 |                   |                                | Li2 <sub>b</sub> -O29-Fe1 = 118.13 |
| <b>Li2</b>      | Li2 <sub>c</sub>  | Li2 <sub>c</sub> -Fe2 = 3.0699 | Li2 <sub>c</sub> -O02-Fe3 = 111.69 |
|                 |                   | Li2 <sub>c</sub> -Fe3 = 3.3429 | Li2 <sub>c</sub> -O20-Fe1 = 117.57 |
|                 |                   | Li2 <sub>c</sub> -Fe1 = 3.6970 | Li2 <sub>c</sub> -O18-Fe2 = 97.07  |
|                 |                   |                                | Li2 <sub>c</sub> -O04-Fe2 = 102.29 |
| <b>Li2</b>      | Li2 <sub>d</sub>  | Li2 <sub>d</sub> -Fe2 = 3.0631 | Li2 <sub>d</sub> -O18-Fe2 = 98.09  |
|                 |                   | Li2 <sub>d</sub> -Fe3 = 3.5162 | Li2 <sub>d</sub> -O04-Fe2 = 99.01  |
|                 |                   | Li2 <sub>d</sub> -Fe1 = 3.5750 | Li2 <sub>d</sub> -O02-Fe3 = 112.63 |
|                 |                   |                                | Li2 <sub>d</sub> -O20-Fe1 = 118.52 |
| <b>Li3</b>      | Li3 <sub>a</sub>  | Li3 <sub>a</sub> -Fe1 = 3.1700 | Li3 <sub>a</sub> -O01-Fe2 = 132.47 |
|                 |                   | Li3 <sub>a</sub> -Fe2 = 3.8507 | Li3 <sub>a</sub> -O15-Fe1 = 102.32 |
|                 |                   |                                | Li3 <sub>a</sub> -O09-Fe1 = 97.81  |
| <b>Li3</b>      | Li3 <sub>b</sub>  | Li3 <sub>b</sub> -Fe1 = 3.1103 | Li3 <sub>b</sub> -O09-Fe1 = 93.45  |
|                 |                   | Li3 <sub>b</sub> -Fe2 = 3.8206 | Li3 <sub>b</sub> -O15-Fe1 = 102.26 |
|                 |                   |                                | Li3 <sub>b</sub> -O01-Fe2 = 131.19 |
| <b>Li3</b>      | Li3 <sub>c</sub>  | Li3 <sub>c</sub> -Fe1 = 3.1847 | Li3 <sub>c</sub> -O15-Fe1 = 101.93 |
|                 |                   | Li3 <sub>c</sub> -Fe2 = 4.005  | Li3 <sub>c</sub> -O09-Fe1 = 98.75  |
|                 |                   |                                | Li3 <sub>c</sub> -O01-Fe2 = 137.60 |
| <b>Li3</b>      | Li3 <sub>d</sub>  | Li3 <sub>d</sub> -Fe1 = 3.1649 | Li3 <sub>d</sub> -O15-Fe1 = 101.28 |
|                 |                   | Li3 <sub>d</sub> -Fe2 = 3.7304 | Li3 <sub>d</sub> -O09-Fe1 = 96.69  |
|                 |                   |                                | Li3 <sub>d</sub> -O01-Fe2 = 129.27 |

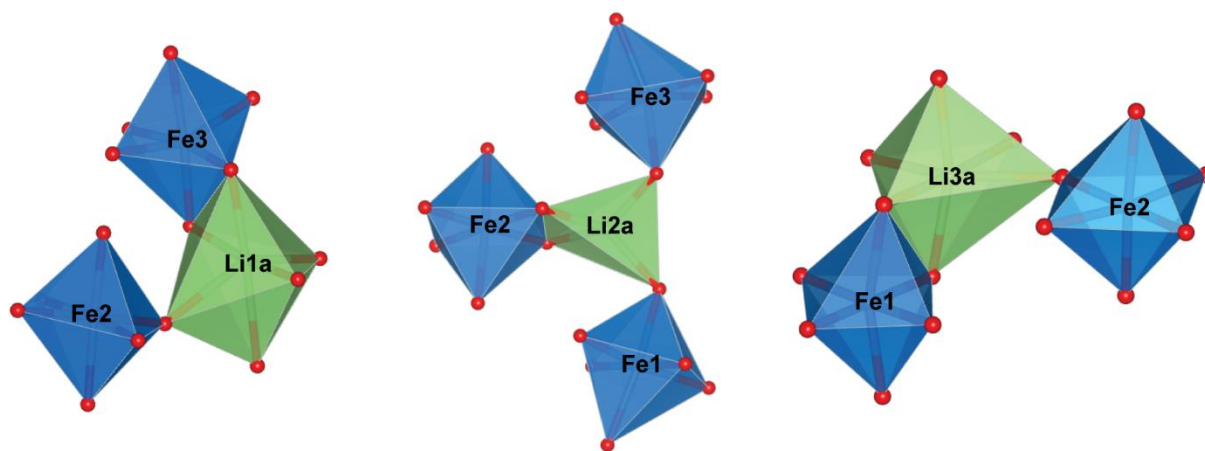

**Figure S4.** Environment for the three Li sites of ORG-D showing the local geometry. (a) Li1<sub>a</sub> (b) Li2<sub>a</sub> and (c) Li3<sub>a</sub>.

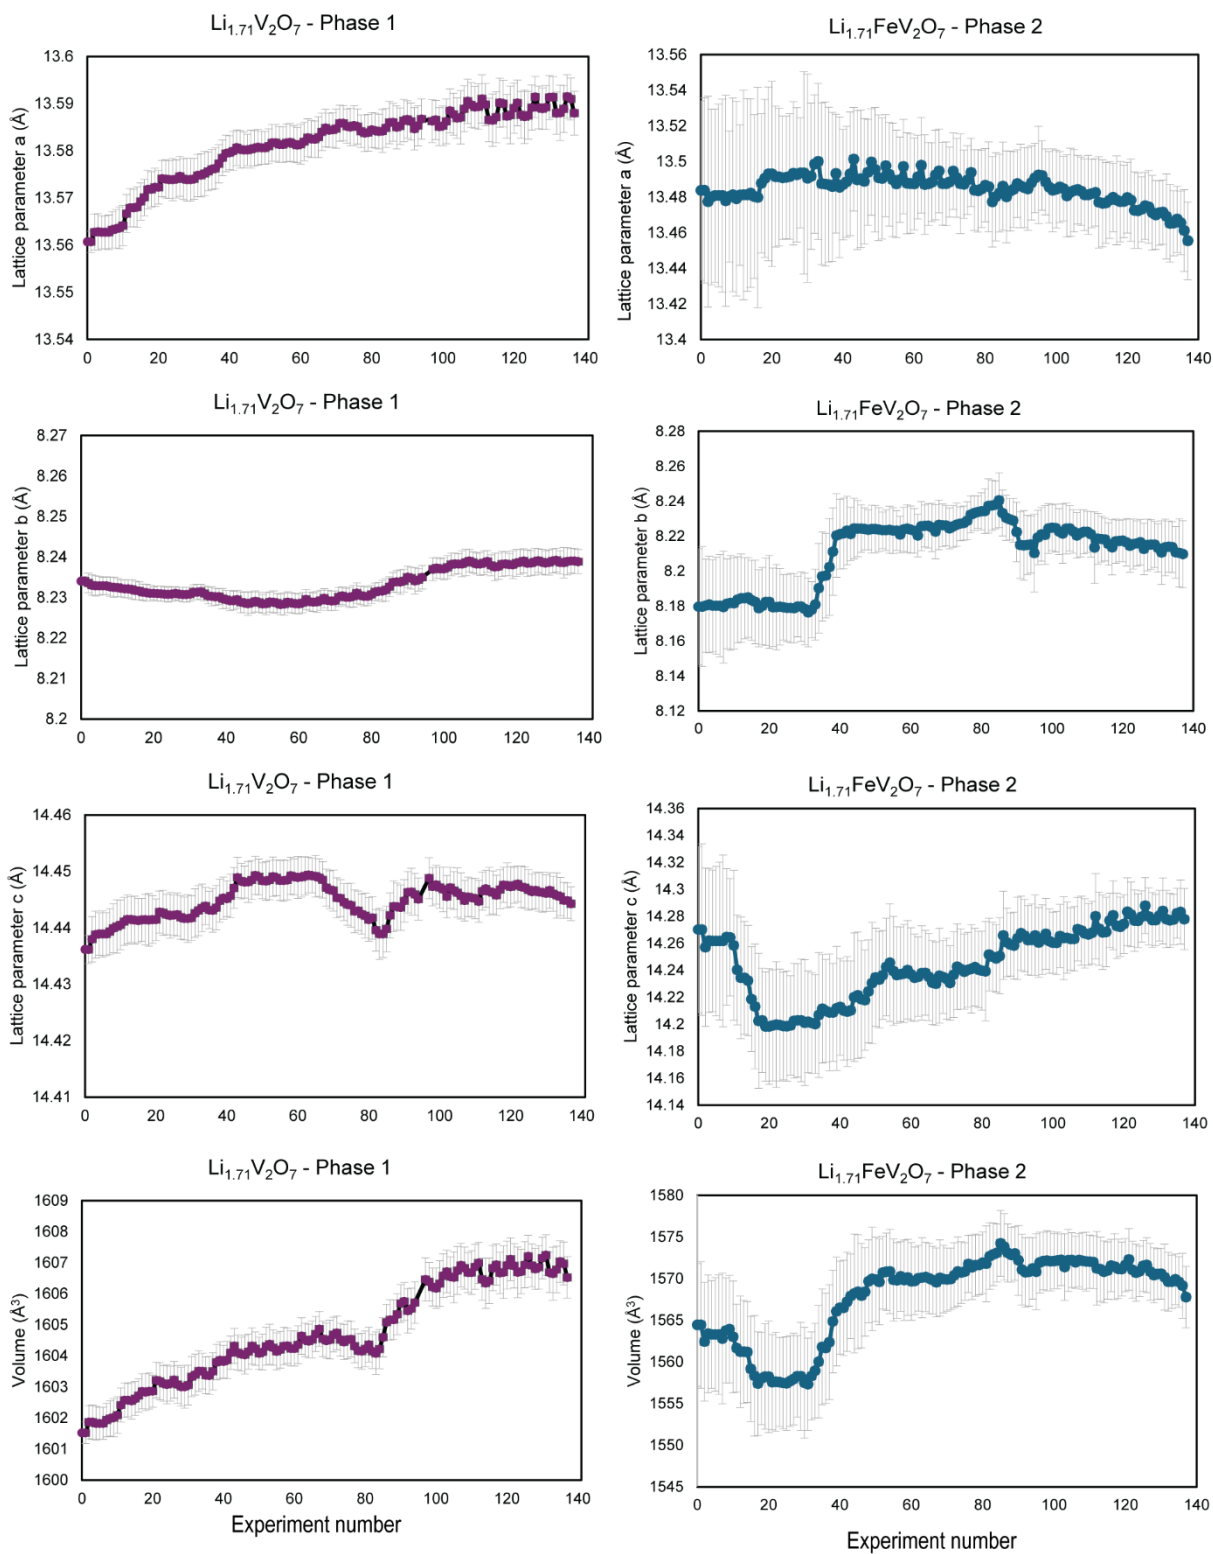

**Figure S5.** Lattice parameter and unit cell volume change during the first discharge cycle.

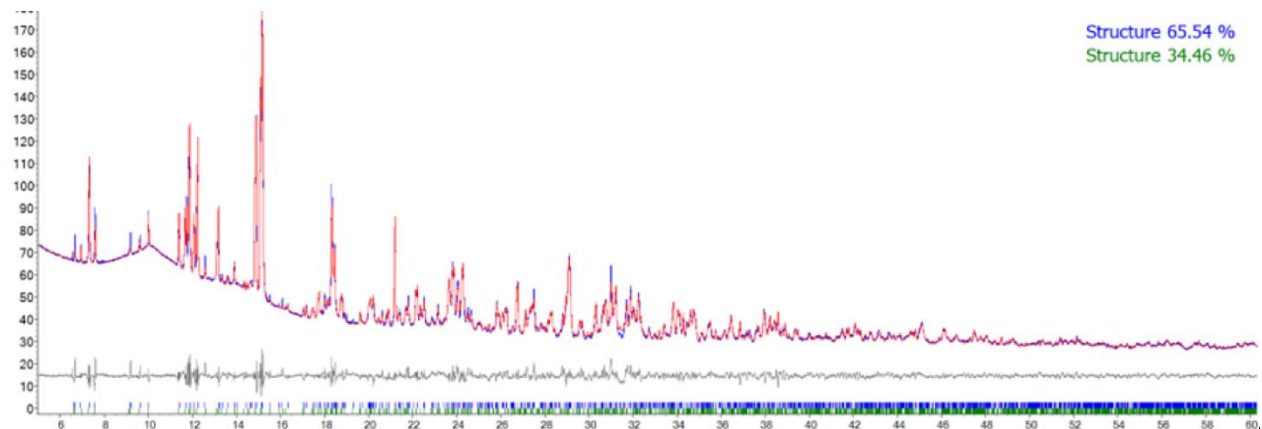

**Figure S6.** Rietveld refinement profile obtained for  $\text{Li}_{1.71}\text{V}_2\text{O}_7$  from the synchrotron XRPD pattern.

**Table S5.** Relaxed cell parameters for GGA+U optimized  $\text{Li}_{1.71}\text{FeV}_2\text{O}_7$  Phase 1 compared to values obtained from Rietveld refinement.

| Unit cell parameters    | $\text{Li}_{1.71}\text{FeV}_2\text{O}_7^*$<br>Phase 1 | $\text{Li}_{1.71}\text{FeV}_2\text{O}_7$<br>Phase1 – GGAU |
|-------------------------|-------------------------------------------------------|-----------------------------------------------------------|
| a (Å)                   | 13.595(2)                                             | 13.875(5)                                                 |
| b (Å)                   | 8.2503(3)                                             | 8.3760(2)                                                 |
| c (Å)                   | 14.2166(1)                                            | 14.4034(5)                                                |
| $\beta$ (°)             | 94.866(5)                                             | 95.874(0)                                                 |
| Volume (Å) <sup>3</sup> | 1588.7(7)                                             | 1665.1(7)                                                 |

\* Data obtained from the Rietveld refinement of  $\text{Li}_{1.71}\text{FeV}_2\text{O}_7$  for phase 1.

**Table S6:** Calculated shifts for Li sites by GGA+U method for the ORG-D structure.

| $\text{Li}_{1.71}\text{FeV}_2\text{O}_7$ Phase 1 |                  |                                      |
|--------------------------------------------------|------------------|--------------------------------------|
| CIF site                                         | Site             | Fermi Shift<br><sup>7</sup> Li (ppm) |
| Li1                                              | Li1 <sub>a</sub> | 59.5                                 |
| Li1                                              | Li1 <sub>b</sub> | 394.5                                |
| Li1                                              | Li1 <sub>c</sub> | -29.77                               |
| Li1                                              | Li1 <sub>d</sub> | 387.0                                |
| Li2                                              | Li2 <sub>a</sub> | 223.3                                |
| Li2                                              | Li2 <sub>b</sub> | 253.0                                |
| Li2                                              | Li2 <sub>c</sub> | 156.2                                |
| Li2                                              | Li2 <sub>d</sub> | 119.1                                |
| Li3                                              | Li3 <sub>a</sub> | 215.8                                |
| Li3                                              | Li3 <sub>b</sub> | 133.9                                |
| Li3                                              | Li3 <sub>c</sub> | 104.2                                |
| Li3                                              | Li3 <sub>d</sub> | 141.4                                |
| New                                              | Li13             | 59.5                                 |
| New                                              | Li14             | -104.2                               |
| New                                              | Li15             | 66.98                                |
| New                                              | Li16             | -96.7                                |
| New                                              | Li17             | -141.4                               |
| New                                              | Li18             | 74.4                                 |
| New                                              | Li19             | -89.3                                |
| New                                              | Li20             | 29.77                                |



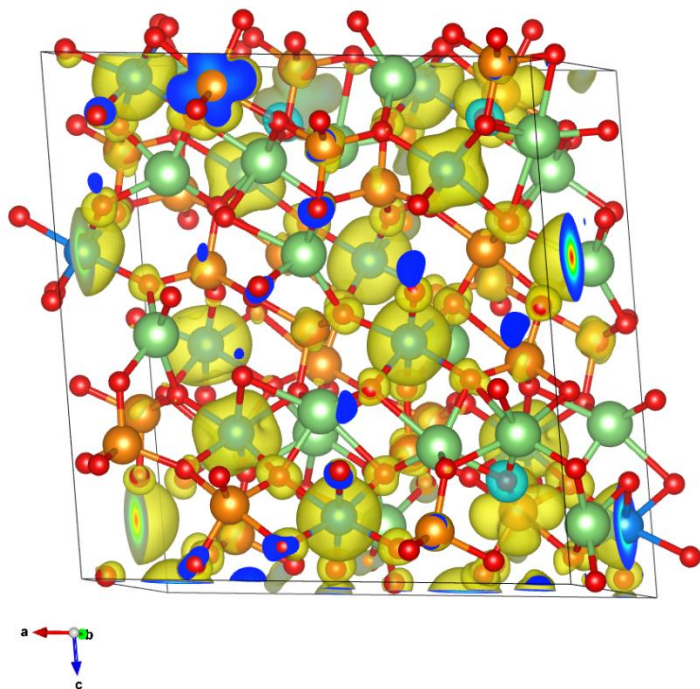

**Figure S7.** 3D spin density map calculated for  $\text{Li}_{1.71}\text{FeV}_2\text{O}_7$  Phase 1 with GGA+U and isosurfaces value equal to  $0.005 \text{ spin}/\text{\AA}^2$ . The positive and negative electron spin densities map are represented in yellow and blue, respectively.
